# Supplementary material for: Isolation of cells from whole blood using shear-induced diffusion
Source: PubMed Central journal article supplement (PMC6010421; doi:10.1038/s41598-018-27779-2), 2018-06-20
Supplement: 41598_2018_27779_MOESM1_ESM.pdf [file 41598_2018_27779_MOESM1_ESM.pdf]

## Supplementary Information

**Title:** Isolation of cells from whole blood using shear-induced diffusion

**Authors:** Jian Zhou\*, Chunlong Tu, Yitao Liang, Bobo Huang, Yifeng Fang, Xiao Liang, Ian Papautsky and Xuesong Ye\*

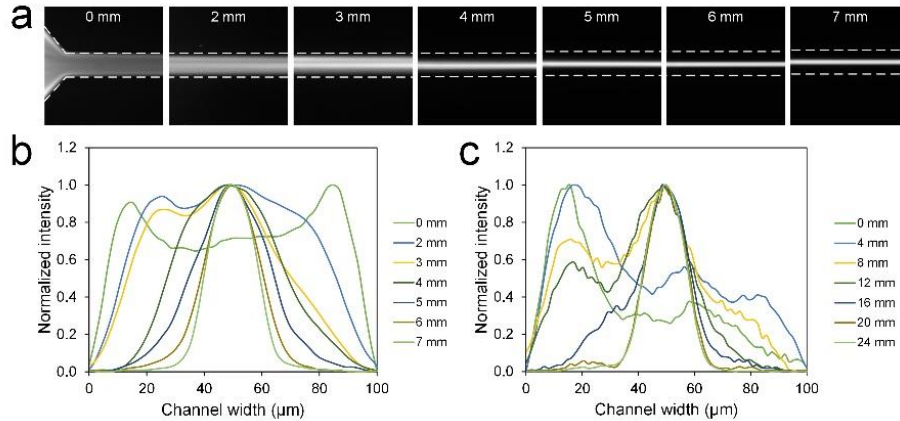

Figure S1 Particle focusing dynamics within Newtonian fluid and non-Newtonian blood ( $2\times$  dilution, images in Figure 2a). (a) Focusing of  $18.7\ \mu\text{m}$  diameter particles dispersed in deionized water within 8 mm downstream length in a  $100\ \mu\text{m} \times 50\ \mu\text{m}$  channel at  $Re = 30$ . (b) Intensity profiles as a function of downstream position corresponding to part (a). (c) Intensity profiles as a function of downstream position of particle migration within non-Newtonian blood sample ( $2\times$  dilution) in  $100\ \mu\text{m} \times 50\ \mu\text{m}$  channel at  $Re \approx 30$ .

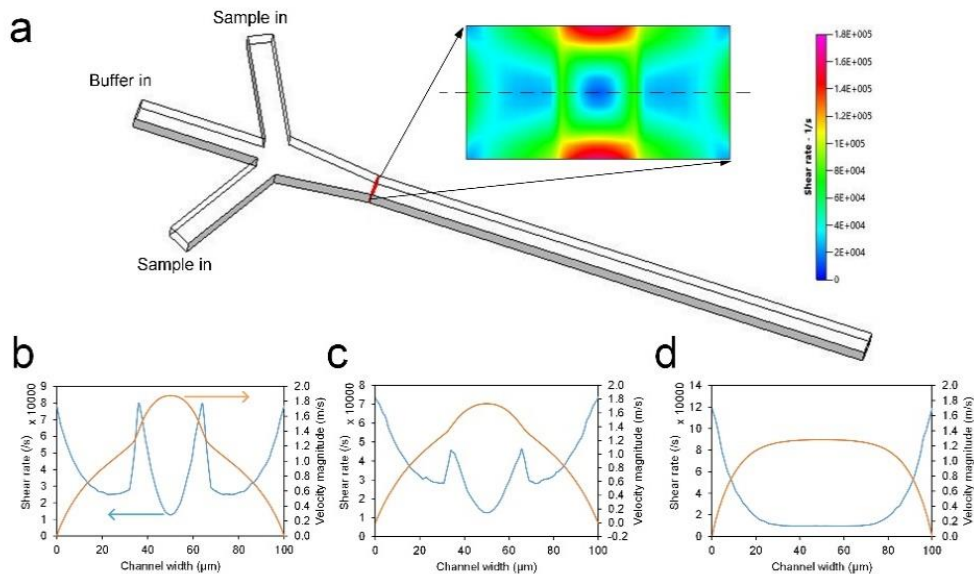

Figure S2 Numerical modeling of co-flow system. (a) Numerical 3D modeling (ESI Group ACE+) of our co-flow channel and the profiles of velocity and shear rate at the beginning of the main channel (dashed line) for three viscosity ratios of sample over buffer: (b) 4, (c) 2 and (d) 1.

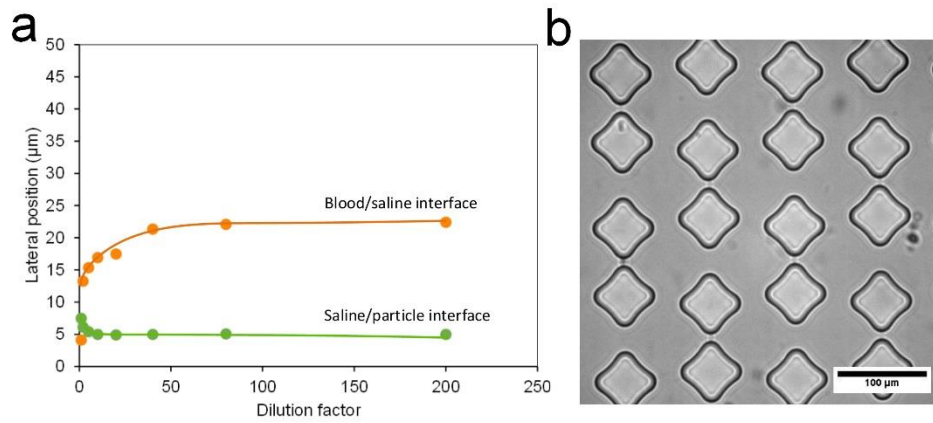

Figure S3 (a) Replot of interface positions as a function of dilution factor in Figure 2c. Lateral position at 0  $\mu\text{m}$  represents channel center axis. (b) Micropost array used to capture target cells separated in the upstream co-flow system.
